# Supplementary material for: Characterisation, identification, clustering, and classification of disease
Source: PubMed Central journal article supplement (PMC7940639; doi:10.1038/s41598-021-84860-z), 2021-03-08
Supplement: 41598_2021_84860_MOESM1_ESM.pdf [file 41598_2021_84860_MOESM1_ESM.pdf]

# Characterisation, identification, clustering, and classification of disease - Supplementary Material

A.J. Webster, K. Gaitskell, I. Turnbull, B.J. Cairns, R. Clarke

February 1, 2021

## Selection of diseases for study

Diseases were considered at the 3- and 4-digit ICD-10 code levels, and either amalgamated into a single group, split into 4-digit codes, or excluded at either the 3-digit or 4-digit level. The criteria for exclusion of diseases are described in the first section of the main article. In the rare occasions where splitting and re-grouping 4-digit codes required a new 3-digit code, then an “a” was appended to the 3-digit code, for example see S22 and H11 in table 1. Any 3- or 4-digit diseases that were studied are listed in table 1, along with any 4-digit exclusions from the same 3-digit category. In addition, each disease was assigned a category of Acute (1), Chronic(2), Infectious (I), Injury (Inj), or Excluded (E), to reflect either the nature of the disease or whether it was excluded.

## Statistical tests - covariance matrices

Meaningful statistical tests and clustering requires the statistical model and its estimated confidence intervals (covariance matrix), to be good approximations. For sufficiently large sample sizes  $n$ , the maximum likelihood estimates (mles) will be normally distributed [1]. Unfortunately there is no general rule to determine how large is “sufficiently large” [1], and this is influenced by the number of cases in each category of a categorical variable. Nonetheless we dropped all diseases with less than 50 cases, because with up to 12 risk factors, some with three categories, it seemed unreasonable to expect a meaningful fit. We subsequently excluded diseases if any of their parameters or covariance matrices were undefined, and ensured that the estimated covariance matrices are positive definite, which we tested by checking that all the eigenvalues are positive. We also excluded diseases if their covariance matrices’ eigenvalues were unusually large, indicating either a poorly defined covariance or excessively large confidence intervals for one or more parameter. Provided the number of cases in each categorical variable are large enough, then the estimated covariance matrices and their eigenvalues will be proportional to  $1/n$  [1]. Plotting for each disease the logarithm of  $n$  times the maximum eigenvalue of the estimated covariance matrix versus  $\log(n)$  confirmed that  $\hat{\Sigma} \propto 1/n$  in most cases (figure 1), and a histogram of the maximum eigenvalues indicated a small number of outliers (figure 1), that indicate very large confidence intervals for one or more parameters. Therefore as a simple criteria to exclude diseases with poorly estimated parameters or poorly defined covariance matrices, we excluded diseases if the maximum eigenvalue was more than 2.5 standard deviations larger than the mean (calculated with outliers). Such diseases would be expected to either not be statistically significant, or to not allow meaningful statistical tests due to poorly estimated covariances. Note that female diseases tend to have larger eigenvalues due to more

parameters being estimated for women than men (HRT and parity are adjusted for in women only).

We separately considered the 400 most common first diseases in an ICD-10 chapter that occurred in the study period from when a participant joined the study until 31st March 2017. Following the clinical selection of diseases and tests of the covariance matrices the number of diseases was reduced to 343 diseases in men and 346 in women. Of these, 150 diseases in men and 140 in women were statistically significant at the 0.05 level after a Bonferoni multiple-testing adjustment, as discussed in the main text (see table 1 in the main text). The proportional hazards model was tested and diseases rejected if they failed the test at the 0.05 level after an FDR multiple-testing adjustment [2], leaving 138 diseases in men and 127 diseases in women. Of the remaining diseases, 86 were present in both men and women. These were used in the clustering and identification studies.

## Sensitivity analyses

As described in Section 5 of the main article, sensitivity analyses were run that clustered diseases after refitting the proportional hazards model with additional exclusions of data, and a model that used tertiles in place of a linear fit to continuous parameters.

Considering firstly sensitivity to exclusions - Taking the 24 clusters of diseases from figure 5 of the main article, the data were refit for each disease, excluding any disease that was present in the same cluster. This was to prevent the possibility of clusters being influenced by data from the same individual, through diseases from different ICD-10 chapters that affect the same person. The clustering is almost identical to the original analysis (figure 2), consistent with the quantitative comparisons in the main text.

To test the sensitivity of clusterings to the model being used to fit the data, we refit a proportional hazards model to the same set of diseases but with sex-specific tertiles for height, BMI, SBP, and year of birth. We continued to stratify by year of birth and adjust by the age at which participants enter the study, and similarly to Section 3, before clustering we used marginalisation to compare a baseline of non-smokers, non-diabetic, rarely drink, and minimum tertiles for height, BMI, and SBP, to parameters for regularly smoking, diabetes, regularly drinking, and maximum tertiles for height, BMI, and SBP. The resulting clusters are similar (figure 3), consistent with the quantitative comparisons in the main text. The model with tertiles continued to find diseases with statistically significant differences between men and women. The diseases with statistically significant differences between men and women (at the 0.05 level after an FDR adjustment), were also similar to those in the main article (figure 4). Only kidney cancer, pulmonary embolisms, and atrial fibrillation had statistically significant differences in the analysis with tertiles, and were not present in the original analysis. Overall there were 4 diseases with different associations that were common to both analyses, and without BMI as a risk factor, kidney stones remained common to the results of both analyses (figure 4).

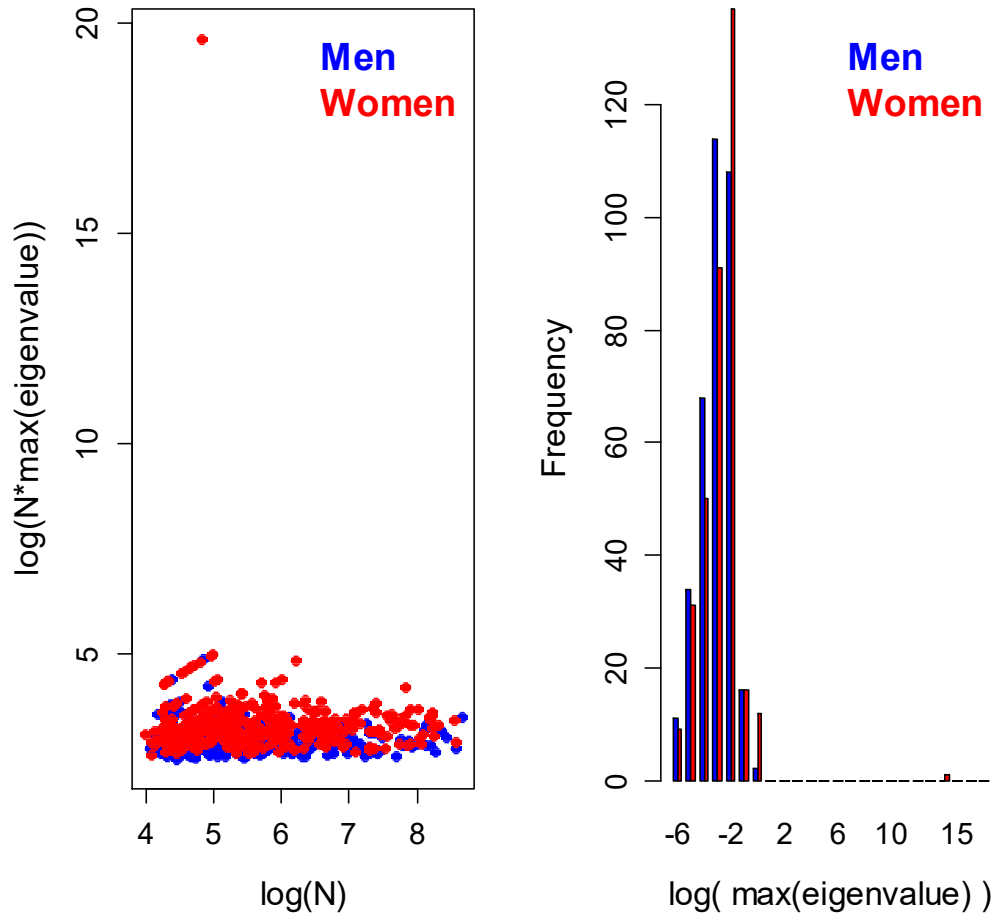

Figure 1: Covariance matrices can be characterised by their eigenvalues, the largest of which will be proportional to  $1/N$  where  $N$  is the number of cases. Outliers indicate unreliable estimates for the covariance matrix typically caused by too few data in one or more category being estimated, such as diabetes for example. Diseases with obvious outliers are excluded from further analysis because reliable tests and confidence intervals require a reliable covariance matrix.

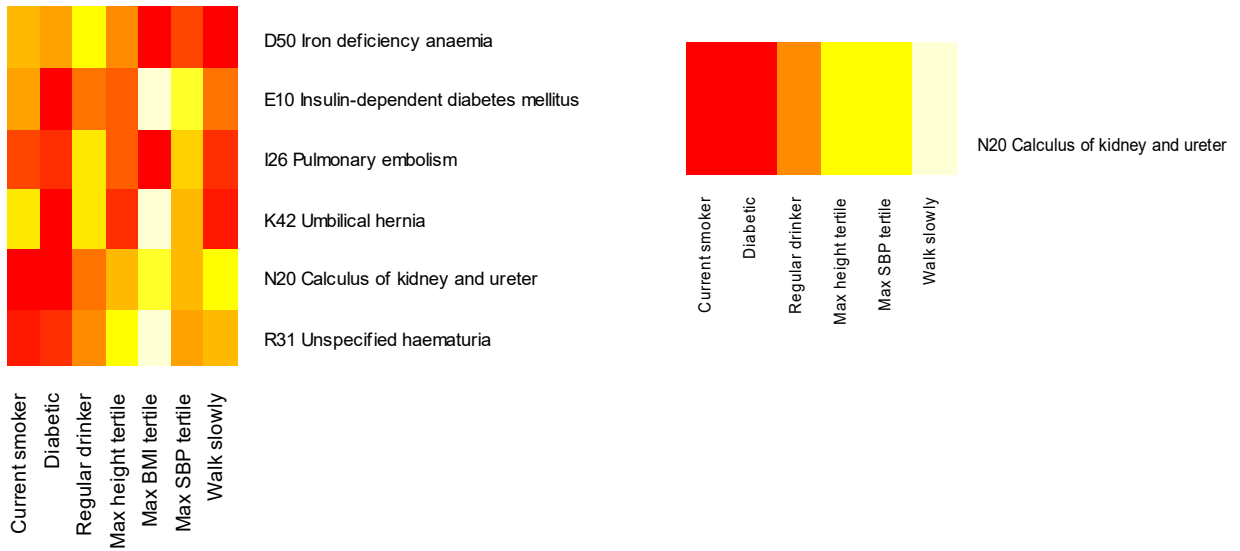

Figure 2: Data with exclusions for prior disease from the same clusters as in figure 5 of the main article, were used to refit the model, to test the sensitivity of clustering to prior disease from the same individual (but different ICD-10 chapter). The results are almost identical to figure 5 of the main article, in agreement with quantitative comparisons of differences in the clusterings. Labels are coloured by their first ICD-10 digit and appended with their cluster number. The dendrogram is coloured with the top 22 clusters in the dendrogram. Associations with potential risk factors are indicated by the heat map, with red for increased risk, white reduced risk, and orange neutral. The figure was produced with R [3] and package “gplots” [4].

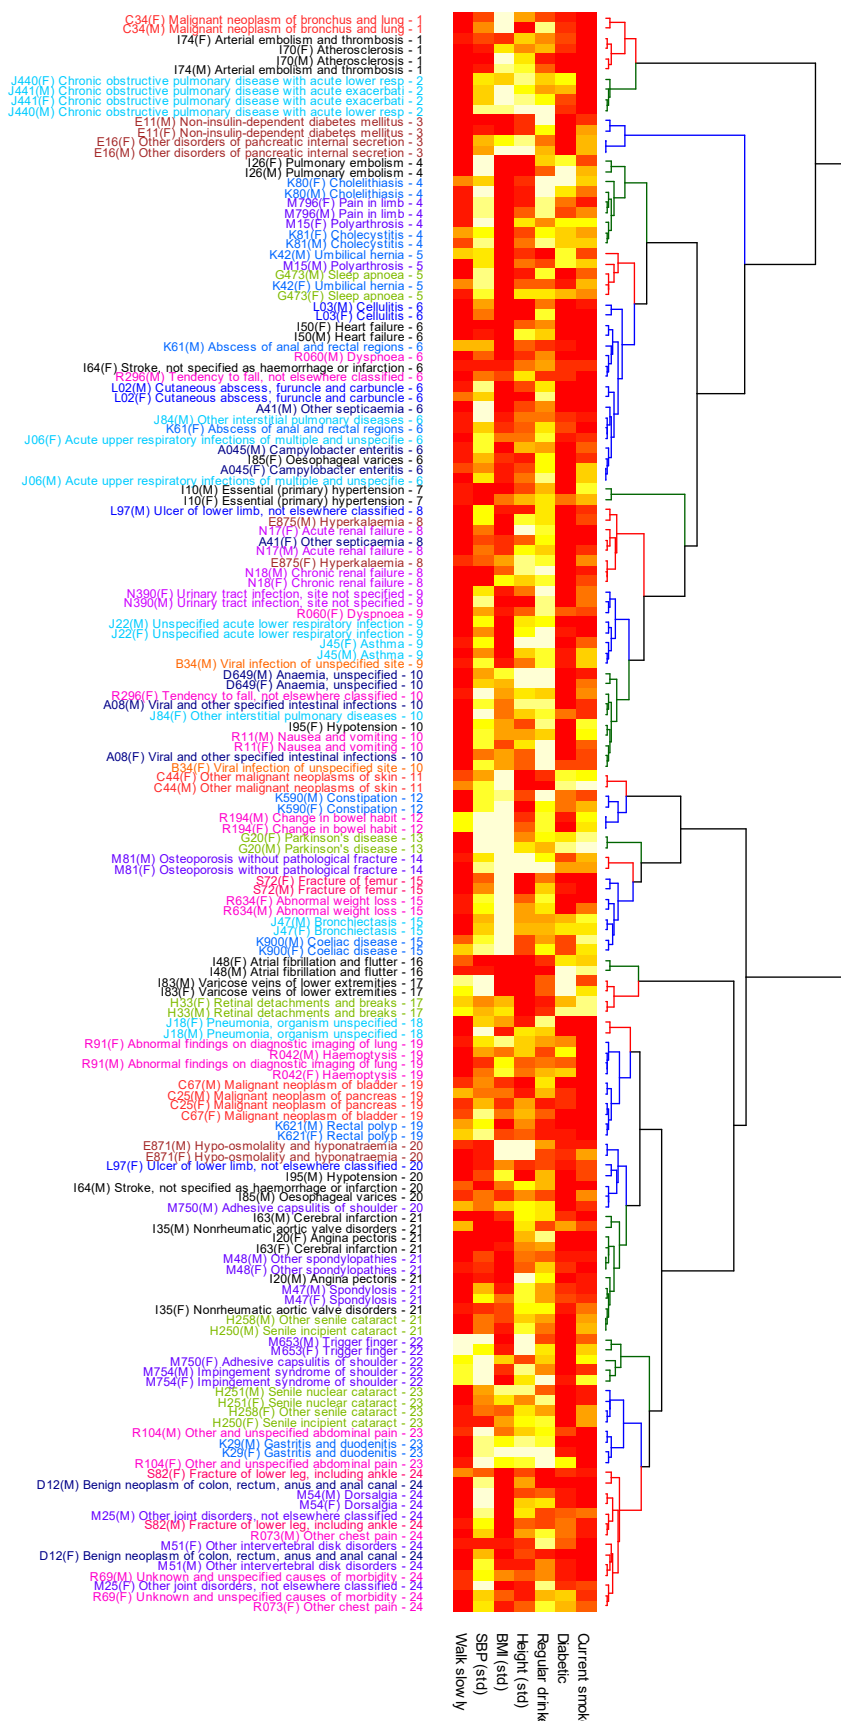

Figure 3: To test the sensitivity of clusterings to changes in the modelling of risk factors, continuous measures for height, BMI, and SBP, were replaced with sex-specific tertiles for height, BMI, SBP, and also year of birth (previously tertiles of men and women together). Despite differences to the model, clustering is similar to figure 5 of the main article, consistent with quantitative comparisons. As for figure 2, labels are coloured by their first ICD-10 digit, and the heat map has red for increased risk, white reduced risk, and orange neutral. The figure was produced with R [3] using packages “dendextend” [5] and “gplots” [4].

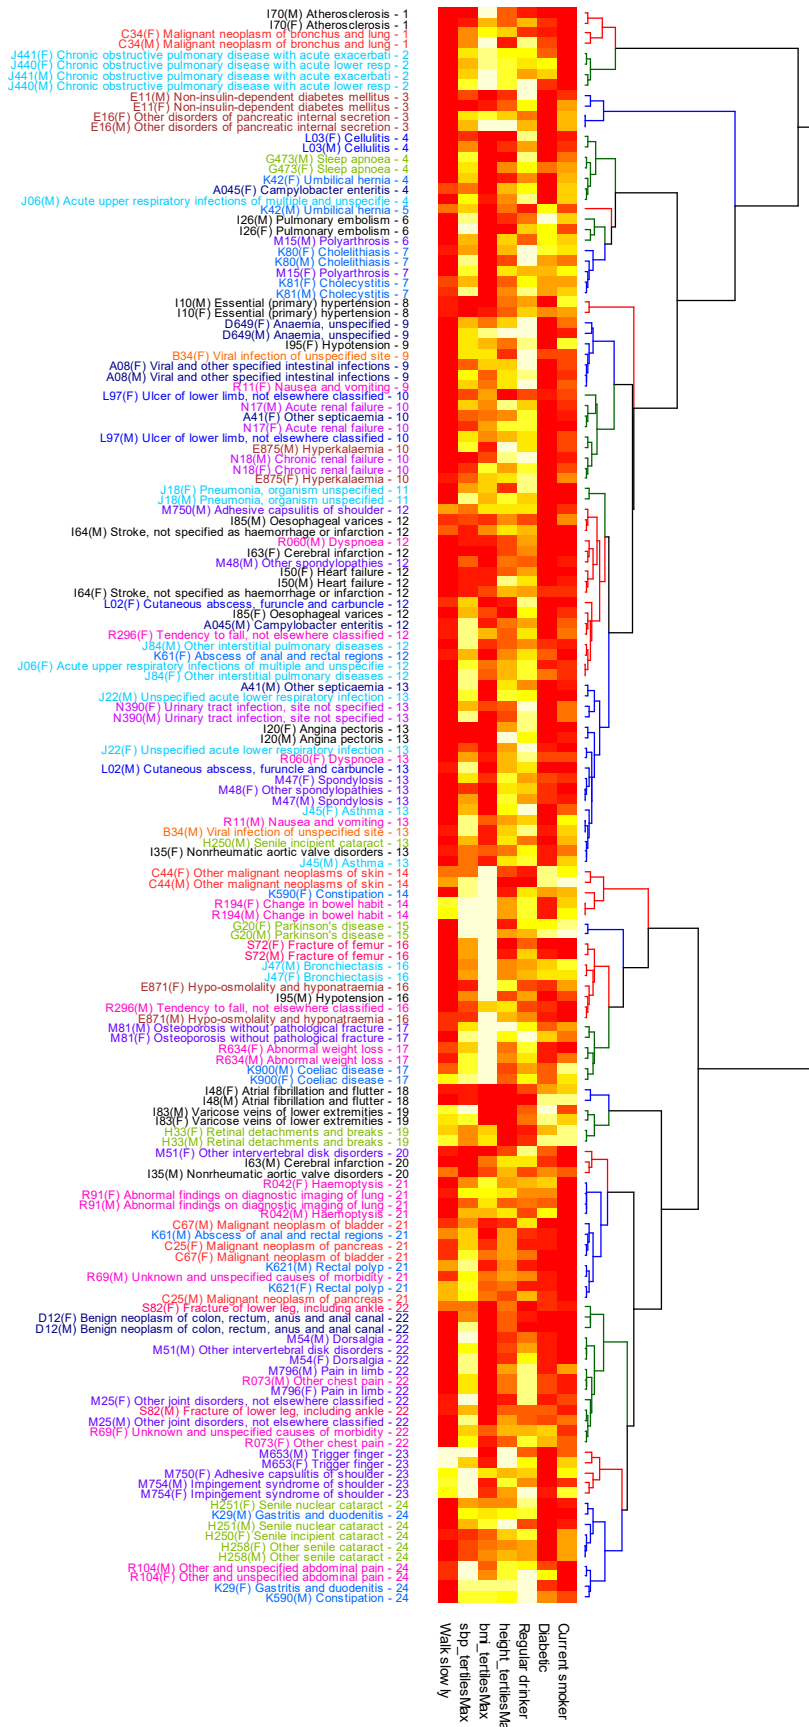

Figure 4: The same diseases in men and women can have statistically significant differences in their associations with risk factors at the 0.05 level after an FDR multiple-testing adjustment, here shown for a model with sex-specific tertiles for height, BMI, SBP, and year of birth. With all potential risk factors (left), and without BMI (right). Associations with greater risk for women than men are indicated by red, lower risks are white, orange is neutral. The figure was produced with R [3] using packages “dendextend” [5] and “gplots” [4].

Table 1: Diseases were selected on criteria described in the first section of the main article, and assigned a category of Acute (1), Chronic(2), Infectious (I), Injury (Inj), or Excluded (E). “ICDs in group”, are 4-digit ICD-10 coded diseases included in the group labelled “Code”, “Excluded ICDs” are any ICDs excluded from the 3- or 4-digit ICD-10 coded group. Diseases in “Code” appended with “\*” are included in the clustering and classification of studies, an “a” was appended when an extra disease code was required . Where the number of cases is given in brackets, they were not among the 400 most common diseases for that gender, and not studied. The table was produced using R and package “xtable” [6].

| Code  | Category | N (male) | N (female) | ICDs in group                                              | Excluded ICDs |
|-------|----------|----------|------------|------------------------------------------------------------|---------------|
| A045* | I        | 122      | 90         | A045                                                       |               |
| A047  | I        | 69       | 89         | A047                                                       |               |
| A048  | I        | 130      | 240        | A048                                                       |               |
| A08*  | I        | 274      | 365        | A080, A081, A082, A083, A084, A085                         |               |
| A09   | I        | 1875     | 3078       | A09, A090, A099                                            |               |
| A41*  | I        | 1264     | 1210       | A410, A411, A412, A413, A414, A415, A418, A419             |               |
| B02   | I        | 80       | 106        | B020, B021, B022, B023, B027, B028, B029                   |               |
| B07   | I        | 158      | 207        | B07                                                        |               |
| B34*  | I        | 297      | 437        | B340, B341, B342, B348, B349                               |               |
| B37   | I        | 177      | 205        | B370, B371, B372, B373, B374, B377, B378, B379             |               |
| C15   | 1        | 370      | 119        | C150, C151, C152, C153, C154, C155, C158, C159             |               |
| C16   | 1        | 222      | 85         | C160, C161, C162, C163, C164, C165, C166, C168, C169       |               |
| C18   | 1        | 965      | 756        | C180, C181, C182, C183, C184, C185, C186, C187, C188, C189 |               |
| C19   | 1        | 133      | (69)       | C19                                                        |               |
| C20   | 1        | 453      | 254        | C20                                                        |               |
| C22   | 1        | 151      | 97         | C220, C221, C227, C229                                     |               |
| C25*  | 1        | 248      | 217        | C250, C251, C252, C253, C254, C257, C258, C259             |               |
| C32   | 1        | 89       | (4)        | C320, C321, C322, C323, C329                               |               |
| C34*  | 1        | 840      | 737        | C340, C341, C342, C343, C348, C349                         |               |
| C43   | 1        | 552      | 556        | C430, C431, C432, C433, C434, C435, C436, C437, C439       |               |
| C44*  | 1        | 4510     | 3676       | C440, C441, C442, C443, C444, C445, C446, C447, C448, C449 |               |
| C45   | 1        | 182      | (40)       | C450, C451, C457, C459                                     |               |
| C49   | 1        | 79       | (51)       | C490, C491, C492, C493, C494, C495, C496, C498, C499       |               |
| C50   | 1        | (32)     | 5130       | C500, C501, C502, C503, C504, C505, C506, C508, C509       |               |
| C54   | 1        | (0)      | 698        | C540, C541, C542, C543, C548, C549                         |               |
| C56   | 1        | (0)      | 427        | C56                                                        |               |
| C61   | 1        | 4200     | (0)        | C61                                                        |               |
| C64   | 1        | 367      | 205        | C64                                                        |               |
| C67*  | 1        | 868      | 260        | C670, C671, C672, C673, C674, C675, C676, C678, C679       |               |
| C71   | 1        | 236      | 143        | C710, C711, C712, C713, C714, C715, C716, C717, C718, C719 |               |
| C73   | 1        | (46)     | 124        | C73                                                        |               |
| C786  | E        | (36)     | 80         |                                                            | C786          |
| C787  | E        | 97       | 83         |                                                            | C787          |

|       |   |      |      |                                                            |      |
|-------|---|------|------|------------------------------------------------------------|------|
| C795  | E | 114  | 79   |                                                            | C795 |
| C833  | 1 | 154  | 124  | C833                                                       |      |
| C851  | 1 | 72   | (42) | C851                                                       |      |
| C859  | 1 | 91   | 93   | C859                                                       |      |
| C90   | 1 | 220  | 182  | C900, C901, C902, C903                                     |      |
| C911  | 1 | 132  | (63) | C911                                                       |      |
| D03   | 1 | 193  | 216  | D030, D031, D032, D033, D034, D035, D036, D037, D038       |      |
| D04   | 1 | 137  | 141  | D040, D041, D042, D043, D044, D045, D046, D047, D049       |      |
| D05   | 1 | (3)  | 872  | D050, D051, D057, D059                                     |      |
| D06   | 1 | (0)  | 74   | D060, D069                                                 |      |
| D075  | 1 | 190  | (0)  | D075                                                       |      |
| D10   | 1 | 100  | 104  | D100, D101, D102, D103, D104, D105, D106, D109             |      |
| D11   | 1 | 115  | 132  | D110, D117, D119                                           |      |
| D12*  | 1 | 5260 | 3741 | D120, D121, D122, D123, D124, D125, D126, D127, D128, D129 |      |
| D17   | 1 | 848  | 872  | D170, D171, D172, D173, D174, D175, D176, D177, D179       |      |
| D180  | 1 | 213  | 260  | D180                                                       |      |
| D21   | 1 | 79   | 109  | D210, D211, D212, D213, D214, D215, D216, D219             |      |
| D22   | 2 | 514  | 763  | D220, D221, D222, D223, D224, D225, D226, D227, D229       |      |
| D23   | 1 | 583  | 648  | D230, D231, D232, D233, D234, D235, D236, D237, D239       |      |
| D24   | 1 | (3)  | 362  | D24                                                        |      |
| D25   | 1 | (0)  | 1909 | D250, D251, D252, D259                                     |      |
| D27   | 1 | (0)  | 555  | D27                                                        |      |
| D32   | 1 | (51) | 137  | D320, D321, D329                                           |      |
| D34   | 1 | (18) | 91   | D34                                                        |      |
| D351  | 1 | (48) | 184  | D351                                                       |      |
| D352  | 1 | 92   | (62) | D352                                                       |      |
| D361  | 1 | 79   | 98   | D361                                                       |      |
| D374  | 1 | 71   | (73) | D374                                                       |      |
| D414  | 1 | 201  | 75   | D414                                                       |      |
| D45   | 1 | 85   | (42) | D45                                                        |      |
| D46   | 2 | 102  | (54) | D460, D461, D462, D464, D465, D466, D467, D469             |      |
| D50   | 1 | 1884 | 2774 | D500, D501, D508, D509                                     |      |
| D619  | 1 | 85   | (47) | D619                                                       |      |
| D630  | E | (64) | 95   |                                                            | D630 |
| D649* | 1 | 1844 | 2068 | D649                                                       |      |
| D696  | 1 | 126  | (67) | D696                                                       |      |
| D70   | 1 | 333  | 567  | D70                                                        |      |
| D751  | 1 | 110  | (42) | D751                                                       |      |
| D86   | 1 | 73   | 77   | D860, D861, D862, D863, D868, D869                         |      |
| E04   | 2 | 153  | 606  | E040, E041, E042, E048, E049                               |      |
| E05   | 1 | (45) | 203  | E050, E051, E052, E053, E055, E058, E059                   |      |
| E10   | 1 | 99   | 99   | E101, E102, E103, E104, E105, E106, E108, E109             |      |



|       |   |      |      |                                                            |                  |
|-------|---|------|------|------------------------------------------------------------|------------------|
| E11*  | 2 | 450  | 212  | E110, E111, E112, E113, E114, E115, E116, E119             |                  |
| E16*  | 1 | 182  | 112  | E161, E162, E168, E169                                     | E160             |
| E21   | 1 | (64) | 262  | E210, E211, E212, E213, E214, E215                         |                  |
| E66   | 2 | 142  | 351  | E660, E662, E668, E669                                     |                  |
| E831  | 2 | 291  | 168  | E831                                                       |                  |
| E835  | 2 | 151  | 187  | E835                                                       |                  |
| E86   | 1 | 166  | 145  | E86                                                        |                  |
| E871* | 1 | 171  | 248  | E871                                                       |                  |
| E875* | 1 | 204  | 112  | E875                                                       |                  |
| E876  | 1 | (52) | 83   | E876                                                       |                  |
| F05   | 1 | 140  | 98   | F050, F051, F058, F059                                     |                  |
| F100  | E | 138  | (58) |                                                            | F100             |
| F103  | E | 125  | (47) |                                                            | F103             |
| F32   | 1 | 186  | 203  | F320, F321, F322, F323, F328, F329                         |                  |
| F41   | 1 | 145  | 275  | F410, F411, F412, F418, F419                               |                  |
| F45   | 1 | (58) | 89   | F450, F452, F453, F454, F458, F459                         |                  |
| G122  | 1 | 101  | 79   | G122                                                       |                  |
| G20*  | 2 | 208  | 101  | G20                                                        |                  |
| G30   | 2 | 78   | (69) | G300, G301, G308, G309                                     |                  |
| G35   | 1 | (50) | 124  | G35                                                        |                  |
| G40   | 1 | 284  | 215  | G400, G401, G402, G403, G404, G405, G406, G407, G408, G409 |                  |
| G43   | 1 | 211  | 670  | G430, G431, G432, G433, G438, G439                         |                  |
| G442  | 1 | (54) | 116  | G442                                                       |                  |
| G45   | 2 | 937  | 755  | G450, G451, G453, G454, G458, G459                         |                  |
| G473* | 2 | 816  | 356  | G473                                                       |                  |
| G479  | E | 170  | 114  |                                                            | G479             |
| G50   | 1 | (48) | 97   | G500, G501, G508, G509                                     |                  |
| G510  | 1 | 141  | 126  | G510                                                       |                  |
| G551  | 2 | 72   | 97   | G551                                                       |                  |
| G560  | 1 | 1740 | 3331 | G560                                                       |                  |
| G562  | 1 | 328  | 212  | G562                                                       |                  |
| G576  | 1 | 130  | 603  | G576                                                       |                  |
| G61   | 1 | 86   | (46) | G610, G618, G619                                           |                  |
| G62   | E | 157  | 102  | G628, G629                                                 | G620, G621, G622 |
| G81   | 1 | 86   | 91   | G811, G819                                                 |                  |
| H00   | 1 | 393  | 337  | H000, H001                                                 |                  |
| H020  | 2 | 281  | 191  | H020                                                       |                  |
| H021  | 2 | 192  | 86   | H021                                                       |                  |
| H023  | 2 | 121  | 237  | H023                                                       |                  |
| H024  | 2 | 242  | 391  | H024                                                       |                  |
| H028  | E | 367  | 415  |                                                            | H028             |
| H029  | E | 150  | 197  |                                                            | H029             |

|       |   |      |      |                                                      |      |
|-------|---|------|------|------------------------------------------------------|------|
| H042  | 2 | 107  | 238  | H042                                                 |      |
| H045  | 2 | 175  | 434  | H045                                                 |      |
| H11a  | 1 | 85   | 116  | H111, H112, H113, H114, H118, H119                   |      |
| H250* | 2 | 626  | 861  | H250                                                 |      |
| H251* | 2 | 1750 | 2533 | H251                                                 |      |
| H258* | 2 | 694  | 943  | H258                                                 |      |
| H259  | 2 | 387  | 610  | H259                                                 |      |
| H264  | 2 | 73   | 92   | H264                                                 |      |
| H268  | 2 | 168  | 234  | H268                                                 |      |
| H269  | 2 | 4214 | 5757 | H269                                                 |      |
| H33*  | 2 | 925  | 692  | H330, H331, H332, H333, H334, H335                   |      |
| H34   | 2 | 148  | 120  | H341, H342, H348, H349                               |      |
| H353  | 2 | 391  | 685  | H353                                                 |      |
| H358  | E | 141  | 114  |                                                      | H358 |
| H40   | 2 | 659  | 825  | H400, H401, H402, H403, H404, H405, H408, H409       |      |
| H431  | 1 | 89   | (65) | H431                                                 |      |
| H50   | 1 | 137  | 206  | H500, H501, H502, H503, H504, H505, H506, H508, H509 |      |
| H53   | 1 | 226  | 230  | H530, H531, H532, H533, H534, H538, H539             |      |
| H610  | 1 | 134  | 117  | H610                                                 |      |
| H65   | 1 | 227  | 230  | H650, H651, H652, H653, H654, H659                   |      |
| H66   | 1 | 83   | 93   | H660, H661, H662, H663, H664, H669                   |      |
| H72   | 1 | 143  | 147  | H720, H721, H722, H728, H729                         |      |
| H811  | 2 | 91   | 115  | H811                                                 |      |
| H830  | 1 | 189  | 239  | H830                                                 |      |
| H919  | 2 | 81   | 110  | H919                                                 |      |
| I10*  | 2 | 209  | 372  | I10                                                  |      |
| I20*  | 1 | 1237 | 1055 | I200, I201, I208, I209                               |      |
| I21   | 1 | 2626 | 967  | I210, I211, I212, I213, I214, I219                   |      |
| I24   | 1 | 165  | 111  | I240, I241, I248, I249                               |      |
| I251  | 2 | 3812 | 1569 | I251                                                 |      |
| I259  | 2 | 252  | 238  | I259                                                 |      |
| I26*  | 1 | 938  | 873  | I260, I269                                           |      |
| I319  | 1 | 94   | (44) | I319                                                 |      |
| I34   | 2 | 162  | 107  | I340, I341, I342, I349                               |      |
| I35*  | 2 | 330  | 243  | I350, I351, I352, I358, I359                         |      |
| I44   | 1 | 356  | 202  | I440, I441, I442, I443, I444, I446, I447             |      |
| I45   | 1 | 98   | (61) | I451, I452, I453, I454, I455, I456, I458, I459       |      |
| I46   | 1 | 84   | (47) | I460, I461, I469                                     |      |
| I471  | 1 | 270  | 369  | I471                                                 |      |
| I472  | 1 | 84   | (43) | I472                                                 |      |
| I48*  | 1 | 2541 | 1642 | I48, I480, I481, I482, I483, I484, I489              |      |
| I495  | 1 | 80   | (58) | I495                                                 |      |

|       |   |      |      |                                                            |                  |
|-------|---|------|------|------------------------------------------------------------|------------------|
| I50*  | 2 | 348  | 235  | I500, I501, I509                                           |                  |
| I60   | 1 | 119  | 232  | I600, I601, I602, I603, I604, I605, I606, I607, I608, I609 |                  |
| I61   | 1 | 234  | 171  | I610, I611, I612, I613, I614, I615, I616, I618, I619       |                  |
| I62   | 1 | 127  | (59) | I620, I621, I629                                           |                  |
| I63*  | 1 | 1294 | 864  | I630, I631, I632, I633, I634, I635, I636, I638, I639       |                  |
| I64*  | 1 | 180  | 126  | I64                                                        |                  |
| I65   | 2 | 117  | (69) | I650, I651, I652, I653                                     |                  |
| I70*  | 2 | 167  | 96   | I700, I701, I702, I708, I709                               |                  |
| I71   | 2 | 344  | (65) | I710, I711, I712, I713, I714, I715, I716, I719             |                  |
| I739  | 2 | 109  | (61) | I739                                                       |                  |
| I74*  | 1 | 137  | 78   | I740, I741, I742, I743, I744, I745, I748, I749             |                  |
| I771  | 1 | 115  | (63) | I771                                                       |                  |
| I80   | 1 | 787  | 607  | I800, I801, I802, I803, I808, I809                         |                  |
| I83*  | 1 | 1042 | 1718 | I830, I831, I832, I839                                     |                  |
| I84   | 1 | 3491 | 3935 | I840, I841, I842, I843, I844, I845, I846, I847, I848, I849 |                  |
| I85*  | 1 | 153  | 84   | I850, I859                                                 |                  |
| I95*  | E | 276  | 222  | I950, I951, I958, I959                                     | I952             |
| J02   | I | 118  | 157  | J020, J028, J029                                           |                  |
| J03   | I | 69   | 123  | J030, J038, J039                                           |                  |
| J06*  | I | 123  | 153  | J060, J068, J069                                           |                  |
| J10   | I | 71   | 81   | J100, J101, J108                                           |                  |
| J13   | I | (51) | 78   | J13                                                        |                  |
| J18*  | I | 2828 | 2395 | J180, J181, J182, J188, J189                               |                  |
| J22*  | I | 1451 | 1389 | J22                                                        |                  |
| J31   | 2 | 80   | (64) | J310, J311, J312                                           |                  |
| J32   | 2 | 280  | 285  | J320, J321, J322, J323, J324, J328, J329                   |                  |
| J33   | 1 | 660  | 318  | J330, J338, J339                                           |                  |
| J342  | 1 | 637  | 380  | J342                                                       |                  |
| J343  | 1 | 86   | 74   | J343                                                       |                  |
| J348  | E | 262  | 262  |                                                            | J348             |
| J35   | 2 | 106  | 162  | J350, J351, J352, J353, J358, J359                         |                  |
| J36   | I | 103  | (61) | J36                                                        |                  |
| J383  | E | 185  | 102  |                                                            | J383             |
| J387  | E | 75   | 100  |                                                            | J387             |
| J392  | I | 102  | 80   | J392                                                       |                  |
| J40   | 1 | (46) | 85   | J40                                                        |                  |
| J440* | 2 | 393  | 319  | J440                                                       |                  |
| J441* | 2 | 240  | 191  | J441                                                       |                  |
| J449  | 2 | 75   | (46) | J449                                                       |                  |
| J45*  | 1 | 281  | 585  | J450, J459                                                 |                  |
| J47*  | 2 | 82   | 163  | J47                                                        |                  |
| J69   | E | 151  | 88   |                                                            | J690, J691, J698 |

|      |   |      |      |                                                      |      |
|------|---|------|------|------------------------------------------------------|------|
| J84* | 2 | 198  | 141  | J840, J841, J848, J849                               |      |
| J90  | 1 | 619  | 506  | J90                                                  |      |
| J93  | 1 | 107  | (67) | J930, J931, J938, J939                               |      |
| J969 | E | 78   | (54) |                                                      | J969 |
| J984 | E | 126  | 137  |                                                      | J984 |
| K011 | 1 | 165  | 209  | K011                                                 |      |
| K02  | 2 | 632  | 685  | K020, K021, K022, K028, K029                         |      |
| K045 | 1 | (32) | 75   | K045                                                 |      |
| K047 | I | 132  | 170  | K047                                                 |      |
| K05  | 1 | 90   | 158  | K050, K051, K052, K053, K054, K055, K056             |      |
| K083 | 1 | 330  | 361  | K083                                                 |      |
| K088 | E | 74   | 106  |                                                      | K088 |
| K130 | 1 | 130  | 165  | K130                                                 |      |
| K132 | 1 | 81   | 76   | K132                                                 |      |
| K137 | E | 339  | 467  |                                                      | K137 |
| K148 | E | 133  | 155  |                                                      | K148 |
| K20  | 1 | 914  | 968  | K20                                                  |      |
| K21  | 2 | 1853 | 2628 | K210, K219                                           |      |
| K221 | 1 | 497  | 336  | K221                                                 |      |
| K222 | 1 | 237  | 172  | K222                                                 |      |
| K227 | 2 | 468  | 259  | K227                                                 |      |
| K228 | E | (58) | 94   |                                                      | K228 |
| K25  | 1 | 308  | 432  | K250, K251, K253, K254, K255, K256, K257, K259       |      |
| K26  | 1 | 252  | 141  | K260, K261, K262, K263, K264, K265, K266, K267, K269 |      |
| K29* | 1 | 2576 | 3948 | K29, K290, K291, K293, K294, K295, K296, K297, K298  | K292 |
| K30  | 2 | 1124 | 2346 | K30                                                  |      |
| K317 | 1 | 283  | 722  | K317                                                 |      |
| K318 | E | 78   | 119  |                                                      | K318 |
| K35  | I | 468  | 523  | K350, K351, K352, K353, K358, K359                   |      |
| K37  | I | (53) | 80   | K37                                                  |      |
| K40  | 2 | 6071 | 426  | K400, K401, K402, K403, K404, K409                   |      |
| K41  | 2 | (29) | 152  | K410, K412, K413, K414, K419                         |      |
| K42* | 2 | 883  | 276  | K420, K421, K429                                     |      |
| K43  | 2 | 326  | 452  | K43, K430, K431, K433, K435, K436, K439              |      |
| K44  | 2 | 1112 | 2138 | K440, K449                                           |      |
| K50  | 1 | 78   | 122  | K500, K501, K508, K509                               |      |
| K51  | 1 | 250  | 231  | K510, K511, K512, K513, K514, K515, K518, K519       |      |
| K528 | E | (50) | 141  |                                                      | K528 |
| K529 | 1 | 1168 | 1919 | K529                                                 |      |
| K55  | 2 | 84   | 112  | K550, K551, K552, K558, K559                         |      |
| K565 | 1 | 86   | 146  | K565                                                 |      |
| K566 | E | 163  | 221  |                                                      | K566 |

|       |   |      |      |                                                |                                    |
|-------|---|------|------|------------------------------------------------|------------------------------------|
| K57   | 2 | 3144 | 4356 | K570, K571, K572, K573, K574, K575, K578, K579 |                                    |
| K58   | 1 | (50) | 155  | K580, K589                                     |                                    |
| K590* | 1 | 652  | 1173 | K590                                           |                                    |
| K60   | 1 | 319  | 185  | K600, K601, K602, K603, K604, K605             |                                    |
| K61*  | I | 214  | 94   | K610, K611, K612, K613, K614                   |                                    |
| K620  | 1 | 126  | 111  | K620                                           |                                    |
| K621* | 1 | 1013 | 775  | K621                                           |                                    |
| K623  | 1 | (40) | 170  | K623                                           |                                    |
| K625  | 1 | 1213 | 1395 | K625                                           |                                    |
| K627  | E | 86   | (11) |                                                | K627                               |
| K628  | E | 218  | 252  |                                                | K628                               |
| K635  | 1 | 2807 | 2352 | K635                                           |                                    |
| K638  | E | 110  | 157  |                                                | K638                               |
| K64   | 1 | 337  | 356  | K640, K641, K642, K643, K644, K645, K648, K649 |                                    |
| K70   | E | 100  | (24) |                                                | K700, K701, K702, K703, K704, K709 |
| K80*  | 2 | 1172 | 2863 | K800, K801, K802, K803, K804, K805, K808       |                                    |
| K81*  | 1 | 259  | 351  | K810, K811, K818, K819                         |                                    |
| K831  | 1 | 115  | 100  | K831                                           |                                    |
| K851  | 1 | (66) | 92   | K851                                           |                                    |
| K859  | 1 | 85   | 76   | K859                                           |                                    |
| K85a  | E | 100  | 78   |                                                | K85                                |
| K900* | 1 | 108  | 173  | K900                                           |                                    |
| K920  | 1 | 166  | 133  | K920                                           |                                    |
| K921  | 1 | 302  | 175  | K921                                           |                                    |
| K922  | 1 | 1219 | 1308 | K922                                           |                                    |
| L02*  | I | 626  | 511  | L020, L021, L022, L023, L024, L028, L029       |                                    |
| L03*  | I | 1827 | 1449 | L030, L031, L032, L033, L038, L039             |                                    |
| L05   | I | 98   | (34) | L050, L059                                     |                                    |
| L08   | I | 159  | 126  | L080, L088, L089                               |                                    |
| L309  | E | (68) | 81   |                                                | L309                               |
| L40   | 2 | 96   | 138  | L400, L401, L403, L404, L405, L408, L409       |                                    |
| L439  | 1 | 80   | 150  | L439                                           |                                    |
| L57   | 2 | 703  | 755  | L570, L573, L574, L575, L578, L579             |                                    |
| L60   | 2 | 177  | 203  | L600, L601, L602, L603, L608, L609             |                                    |
| L720  | 1 | 432  | 475  | L720                                           |                                    |
| L721  | 1 | 754  | 814  | L721                                           |                                    |
| L729  | 1 | 180  | 228  | L729                                           |                                    |
| L81   | 1 | 154  | 228  | L810, L812, L813, L814, L816, L817, L818, L819 |                                    |
| L82   | 2 | 733  | 802  | L82                                            |                                    |
| L85   | 2 | 191  | 191  | L851, L852, L858, L859                         |                                    |
| L900  | 1 | (15) | 96   | L900                                           |                                    |
| L905  | 1 | 319  | 521  | L905                                           |                                    |

|       |   |      |      |                                                            |  |            |
|-------|---|------|------|------------------------------------------------------------|--|------------|
| L918  | E | 81   | (70) |                                                            |  | L918       |
| L97*  | 2 | 141  | 81   | L97                                                        |  |            |
| L980  | 1 | 80   | 78   | L980                                                       |  |            |
| L988  | E | 130  | 168  |                                                            |  | L988       |
| L989  | E | 991  | 1072 |                                                            |  | L989       |
| M06   | 2 | 112  | 325  | M060, M061, M062, M063, M064, M068, M069                   |  |            |
| M10   | 2 | 194  | (29) | M100, M109                                                 |  |            |
| M13   | 2 | 199  | 320  | M130, M131, M138, M139                                     |  |            |
| M15*  | 2 | 279  | 430  | M150, M151, M152, M153, M154, M158, M159                   |  |            |
| M16   | 2 | 2688 | 3825 | M160, M161, M162, M163, M164, M165, M166, M167, M169       |  |            |
| M17   | 2 | 2941 | 3322 | M170, M171, M172, M173, M174, M175, M179                   |  |            |
| M18   | 2 | 110  | 406  | M180, M181, M183, M189                                     |  |            |
| M19   | 2 | 718  | 1203 | M190, M191, M192, M198, M199                               |  |            |
| M201  | 2 | 246  | 2647 | M201                                                       |  |            |
| M202  | 2 | 133  | 373  | M202                                                       |  |            |
| M204  | 2 | 71   | 254  | M204                                                       |  |            |
| M205  | 2 | (60) | 237  | M205                                                       |  |            |
| M23   | 2 | 3515 | 3130 | M230, M231, M232, M233, M234, M235, M236, M238, M239       |  |            |
| M241  | E | 71   | 105  |                                                            |  | M241       |
| M25*  | 2 | 1148 | 1649 | M250, M251, M252, M253, M254, M255, M256, M257, M258, M259 |  |            |
| M316  | E | (60) | 125  |                                                            |  | M316       |
| M43   | 2 | 102  | 181  | M430, M431, M432, M435, M436, M438                         |  |            |
| M47*  | 2 | 331  | 435  | M471, M472, M478, M479                                     |  |            |
| M48*  | 2 | 502  | 487  | M480, M481, M484, M485, M488, M489                         |  |            |
| M50   | 2 | 195  | 181  | M500, M501, M502, M503, M508, M509                         |  |            |
| M51*  | 2 | 927  | 1121 | M510, M511, M512, M513, M514, M518, M519                   |  |            |
| M533  | E | (14) | 81   |                                                            |  | M533       |
| M54*  | 2 | 1460 | 2121 | M540, M541, M542, M543, M544, M545, M546, M548, M549       |  |            |
| M653* | 2 | 452  | 624  | M653                                                       |  |            |
| M654  | 1 | (17) | 77   | M654                                                       |  |            |
| M659  | E | 76   | 113  |                                                            |  | M659       |
| M674  | 1 | 391  | 680  | M674                                                       |  |            |
| M70   | E | 253  | 204  | M700, M701, M702, M703, M704, M705, M706, M707             |  | M708, M709 |
| M720  | 2 | 1497 | 488  | M720                                                       |  |            |
| M750* | 2 | 187  | 376  | M750                                                       |  |            |
| M751  | 2 | 834  | 675  | M751                                                       |  |            |
| M753  | 2 | (22) | 79   | M753                                                       |  |            |
| M754* | 2 | 899  | 1069 | M754                                                       |  |            |
| M758  | E | 101  | 103  |                                                            |  | M758       |
| M771  | 1 | 74   | 83   | M771                                                       |  |            |
| M791  | 1 | (67) | 97   | M791                                                       |  |            |
| M796* | 1 | 683  | 932  | M796                                                       |  |            |

|       |   |      |      |                                                            |  |      |
|-------|---|------|------|------------------------------------------------------------|--|------|
| M798  | E | 778  | 726  |                                                            |  | M798 |
| M809  | 2 | (32) | 94   | M809                                                       |  |      |
| M81*  | 2 | 100  | 690  | M810, M815, M816, M818, M819                               |  | M814 |
| M840  | E | (36) | 107  |                                                            |  | M840 |
| M841  | E | 123  | 143  |                                                            |  | M841 |
| M86   | I | 108  | (43) | M861, M862, M864, M866, M868, M869                         |  |      |
| M899  | E | (62) | 99   |                                                            |  | M899 |
| N02   | 1 | 93   | 75   | N020, N021, N022, N023, N028, N029                         |  |      |
| N12   | 1 | 102  | 300  | N12                                                        |  |      |
| N13   | 1 | 556  | 303  | N130, N131, N132, N133, N134, N135, N136, N137, N138, N139 |  |      |
| N17*  | 1 | 655  | 334  | N170, N171, N178, N179                                     |  |      |
| N18*  | 2 | 198  | 88   | N180, N181, N182, N183, N184, N185, N188, N189             |  |      |
| N20   | 1 | 1114 | 447  | N200, N201, N202, N209                                     |  |      |
| N21   | 1 | 193  | (29) | N210, N211, N218                                           |  |      |
| N23   | 1 | 241  | 106  | N23                                                        |  |      |
| N302  | E | 78   | 81   |                                                            |  | N302 |
| N308  | E | (67) | 83   |                                                            |  | N308 |
| N309  | I | 127  | 160  | N309                                                       |  |      |
| N318  | E | (53) | 82   |                                                            |  | N318 |
| N320  | 1 | 381  | (7)  | N320                                                       |  |      |
| N323  | 1 | 80   | (17) | N323                                                       |  |      |
| N328  | E | 768  | 395  |                                                            |  | N328 |
| N329  | E | 127  | (57) |                                                            |  | N329 |
| N35   | 1 | 541  | 367  | N358, N359                                                 |  |      |
| N390* | I | 1776 | 1761 | N390                                                       |  |      |
| N393  | E | (58) | 1094 |                                                            |  | N393 |
| N394  | E | 79   | 167  |                                                            |  | N394 |
| N398  | E | 74   | (32) |                                                            |  | N398 |
| N399  | E | 92   | (38) |                                                            |  | N399 |
| N40   | 2 | 3353 | (1)  | N40                                                        |  |      |
| N41   | I | 489  | (0)  | N410, N411, N412, N413, N418, N419                         |  |      |
| N428  | E | 183  | (0)  |                                                            |  | N428 |
| N429  | E | 73   | (0)  |                                                            |  | N429 |
| N43   | 1 | 587  | (0)  | N432, N433, N434                                           |  |      |
| N459  | I | 218  | (0)  | N459                                                       |  |      |
| N47   | 1 | 849  | (0)  | N47                                                        |  |      |
| N480  | 1 | 121  | (0)  | N480                                                       |  |      |
| N481  | 1 | 97   | (0)  | N481                                                       |  |      |
| N486  | 1 | 203  | (0)  | N486                                                       |  |      |
| N488  | E | 112  | (0)  |                                                            |  | N488 |
| N501  | 1 | 174  | (0)  | N501                                                       |  |      |
| N508  | E | 591  | (0)  |                                                            |  | N508 |

|       |   |      |      |                                                      |      |
|-------|---|------|------|------------------------------------------------------|------|
| N60   | 1 | (1)  | 295  | N600, N601, N602, N603, N604, N608, N609             |      |
| N61   | 1 | (4)  | 98   | N61                                                  |      |
| N62   | 1 | (22) | 88   | N62                                                  |      |
| N63   | 1 | (8)  | 191  | N63                                                  |      |
| N645  | E | (2)  | 113  |                                                      | N645 |
| N648  | E | (1)  | 81   |                                                      | N648 |
| N80   | 2 | (0)  | 162  | N800, N801, N803, N804, N805, N806, N808, N809       |      |
| N81   | 2 | (0)  | 3817 | N810, N811, N812, N813, N814, N815, N816, N818, N819 |      |
| N832  | E | (0)  | 610  |                                                      | N832 |
| N84   | 1 | (0)  | 2686 | N840, N841, N842, N843, N848, N849                   |      |
| N850  | 1 | (0)  | 117  | N850                                                 |      |
| N858  | E | (0)  | 226  |                                                      | N858 |
| N87   | 1 | (0)  | 156  | N870, N871, N872, N879                               |      |
| N898  | E | (0)  | 110  |                                                      | N898 |
| N904  | 1 | (0)  | 106  | N904                                                 |      |
| N907  | 1 | (0)  | 125  | N907                                                 |      |
| N908  | E | (0)  | 132  |                                                      | N908 |
| N92   | 2 | (2)  | 1585 | N920, N921, N923, N924, N925, N926                   |      |
| N93   | 1 | (0)  | 345  | N930, N938, N939                                     |      |
| N95   | 2 | (0)  | 1767 | N950, N951, N952, N953, N958, N959                   |      |
| N993  | E | (0)  | 120  |                                                      | N993 |
| R000  | R | (54) | 75   | R000                                                 |      |
| R001  | R | 202  | 76   | R001                                                 |      |
| R002  | R | 288  | 523  | R002                                                 |      |
| R040  | R | 452  | 323  | R040                                                 |      |
| R042* | R | 304  | 233  | R042                                                 |      |
| R05   | R | 235  | 330  | R05                                                  |      |
| R060* | R | 655  | 723  | R060                                                 |      |
| R065  | R | 203  | 104  | R065                                                 |      |
| R068  | R | 108  | (67) | R068                                                 |      |
| R072  | R | 862  | 935  | R072                                                 |      |
| R073* | R | 1323 | 1395 | R073                                                 |      |
| R074  | R | 3581 | 3480 | R074                                                 |      |
| R101  | R | 977  | 1660 | R101                                                 |      |
| R102  | R | (29) | 108  | R102                                                 |      |
| R103  | R | 673  | 1251 | R103                                                 |      |
| R104* | R | 1404 | 2261 | R104                                                 |      |
| R11*  | R | 356  | 706  | R11                                                  |      |
| R12   | R | 116  | 238  | R12                                                  |      |
| R13   | R | 860  | 1244 | R13                                                  |      |
| R14   | R | (67) | 130  | R14                                                  |      |
| R15   | R | 79   | 413  | R15                                                  |      |



|       |     |      |      |                                                            |
|-------|-----|------|------|------------------------------------------------------------|
| R17   | R   | 96   | (57) | R17                                                        |
| R18   | R   | 104  | 144  | R18                                                        |
| R190  | R   | (58) | 170  | R190                                                       |
| R194* | R   | 1560 | 3001 | R194                                                       |
| R195  | R   | 273  | 438  | R195                                                       |
| R198  | R   | 150  | 248  | R198                                                       |
| R20   | R   | 196  | 204  | R200, R201, R202, R203, R208                               |
| R21   | R   | 81   | 130  | R21                                                        |
| R22   | R   | 244  | 268  | R220, R221, R222, R223, R224, R227, R229                   |
| R268  | R   | 70   | (73) | R268                                                       |
| R296* | R   | 114  | 109  | R296                                                       |
| R298  | R   | 176  | 164  | R298                                                       |
| R31   | R   | 2835 | 2358 | R31                                                        |
| R32   | R   | 77   | 136  | R32                                                        |
| R33   | R   | 1133 | 164  | R33                                                        |
| R35   | R   | 335  | 187  | R35                                                        |
| R39   | R   | 645  | 345  | R391, R398                                                 |
| R410  | R   | 200  | 172  | R410                                                       |
| R42   | R   | 449  | 419  | R42                                                        |
| R490  | R   | 69   | (65) | R490                                                       |
| R50   | R   | 332  | 355  | R500, R501, R508, R509                                     |
| R51   | R   | 673  | 1181 | R51                                                        |
| R53   | R   | 190  | 243  | R53                                                        |
| R55   | R   | 1596 | 1255 | R55                                                        |
| R568  | R   | 297  | 218  | R568                                                       |
| R59   | R   | 228  | 232  | R590, R591, R599                                           |
| R600  | R   | (60) | 74   | R600                                                       |
| R634* | R   | 275  | 380  | R634                                                       |
| R69*  | R   | 941  | 1025 | R69                                                        |
| R79   | R   | 1686 | 146  | R790, R798, R799                                           |
| R876  | R   | (0)  | 128  | R876                                                       |
| R91*  | R   | 361  | 355  | R91                                                        |
| R933  | R   | 199  | 245  | R933                                                       |
| R945  | R   | 107  | 147  | R945                                                       |
| S000  | Inj | 71   | (68) | S000                                                       |
| S008  | Inj | 137  | 141  | S008                                                       |
| S009  | Inj | 90   | 103  | S009                                                       |
| S010  | Inj | 163  | 125  | S010                                                       |
| S018  | Inj | 218  | 153  | S018                                                       |
| S02   | Inj | 303  | 290  | S020, S021, S022, S023, S024, S025, S026, S027, S028, S029 |
| S065  | Inj | 144  | 94   | S065                                                       |
| S066  | Inj | 79   | (62) | S066                                                       |

|      |     |     |      |                                                            |
|------|-----|-----|------|------------------------------------------------------------|
| S099 | Inj | 262 | 241  | S099                                                       |
| S224 | Inj | 166 | (64) | S224                                                       |
| S22a | Inj | 109 | 87   | S220, S221                                                 |
| S270 | Inj | 75  | (33) | S270                                                       |
| S32  | Inj | 253 | 377  | S320, S321, S322, S323, S324, S325, S327, S328             |
| S42  | Inj | 516 | 776  | S420, S421, S422, S423, S424, S427, S428, S429             |
| S430 | Inj | 102 | (72) | S430                                                       |
| S52  | Inj | 602 | 2906 | S520, S521, S522, S523, S524, S525, S526, S527, S528       |
| S610 | Inj | 301 | 224  | S610                                                       |
| S611 | Inj | 152 | 81   | S611                                                       |
| S618 | Inj | 103 | 82   | S618                                                       |
| S62  | Inj | 567 | 413  | S620, S621, S622, S623, S624, S625, S626, S627, S628       |
| S66  | Inj | 255 | 108  | S660, S661, S662, S663, S664, S665, S666, S667, S668, S669 |
| S681 | Inj | 100 | (33) | S681                                                       |
| S72* | Inj | 557 | 1040 | S720, S721, S722, S723, S724, S727, S728, S729             |
| S761 | Inj | 180 | (18) | S761                                                       |
| S82* | Inj | 773 | 1803 | S820, S821, S822, S823, S824, S825, S826, S827, S828, S829 |
| S860 | Inj | 167 | (55) | S860                                                       |
| S92  | Inj | 169 | 182  | S920, S921, S922, S923, S924, S925, S927, S929             |

---

## References

- [1] Hardle, W. & Simar, L. *Applied Multivariate Statistical Analysis* (Springer, 2015).
- [2] Wasserman, L. *All of Statistics* (Springer, 2005).
- [3] R Core Team. *R: A Language and Environment for Statistical Computing*. R Foundation for Statistical Computing, Vienna, Austria (2020).
- [4] Warnes, G. R. *et al. gplots: Various R Programming Tools for Plotting Data* (2020).
- [5] Galili, T. dendextend: an r package for visualizing, adjusting, and comparing trees of hierarchical clustering. *Bioinformatics* (2015).
- [6] Dahl, D. B., Scott, D., Roosen, C., Magnusson, A. & Swinton, J. *xtable: Export Tables to LaTeX or HTML* (2019).
